# Supplementary figures and images for: Antibody Pressure by a Human Monoclonal Antibody Targeting the 2009 Pandemic H1N1 Virus Hemagglutinin Drives the Emergence of a Virus with Increased Virulence in Mice
Source: PubMed Central journal article supplement — mBio. 2012 May 29;3(3):e00120-12. doi: 10.1128/mBio.00120-12 (PMC3372962; doi:10.1128/mbio.00120-12), 2012-05-29

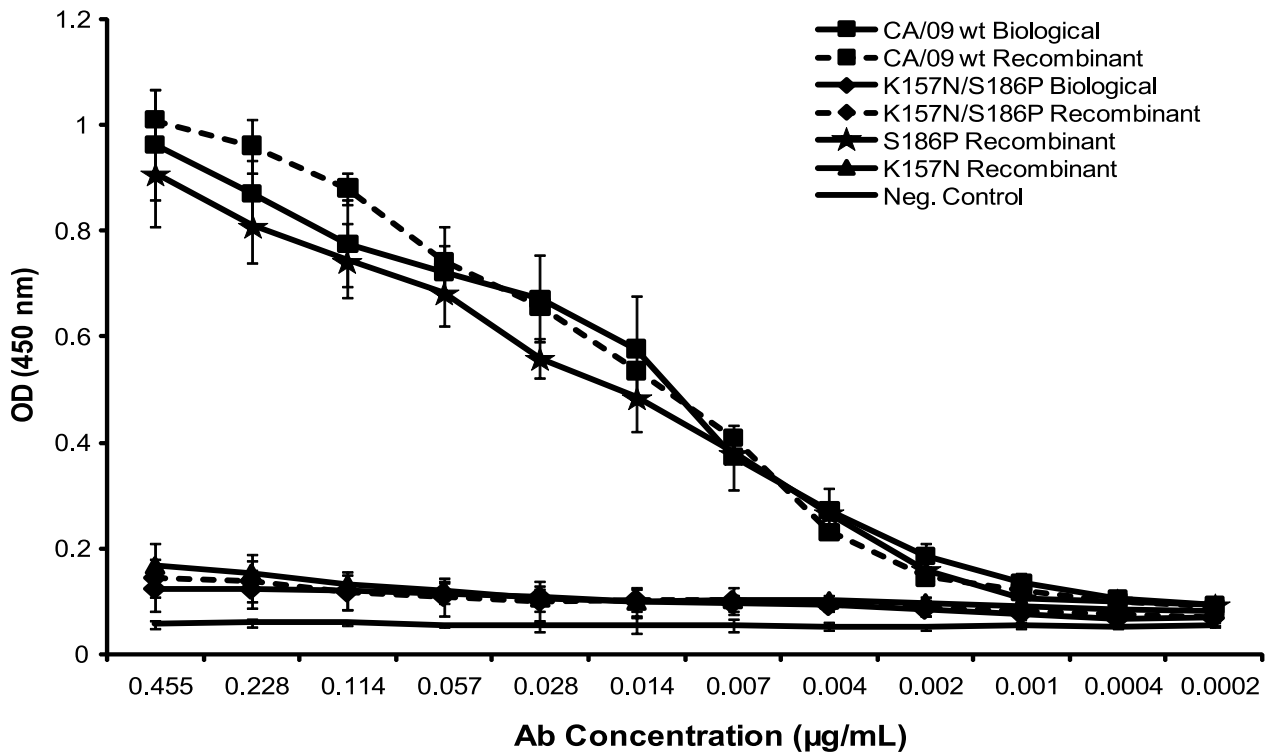

Supplement: mbo003121280sf01.pdf [file mbo003121280sf01.pdf]

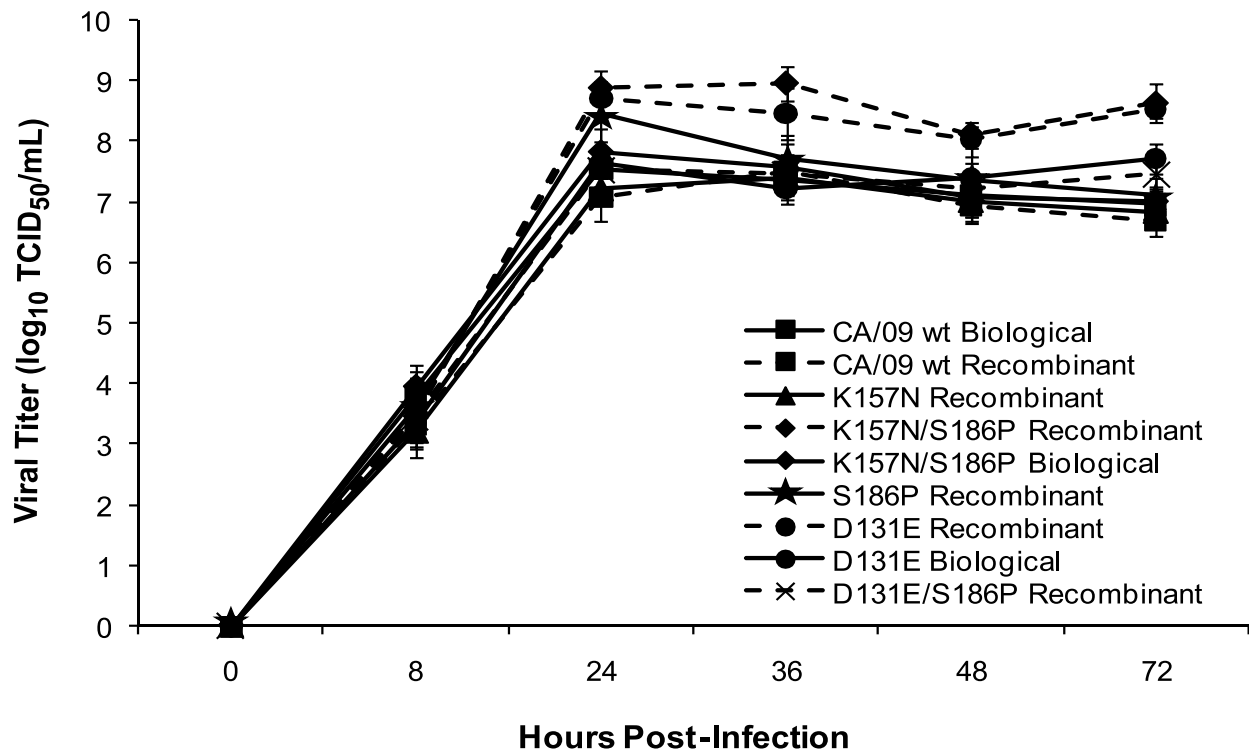

Supplement: mbo003121280sf02.pdf [file mbo003121280sf02.pdf]

**A**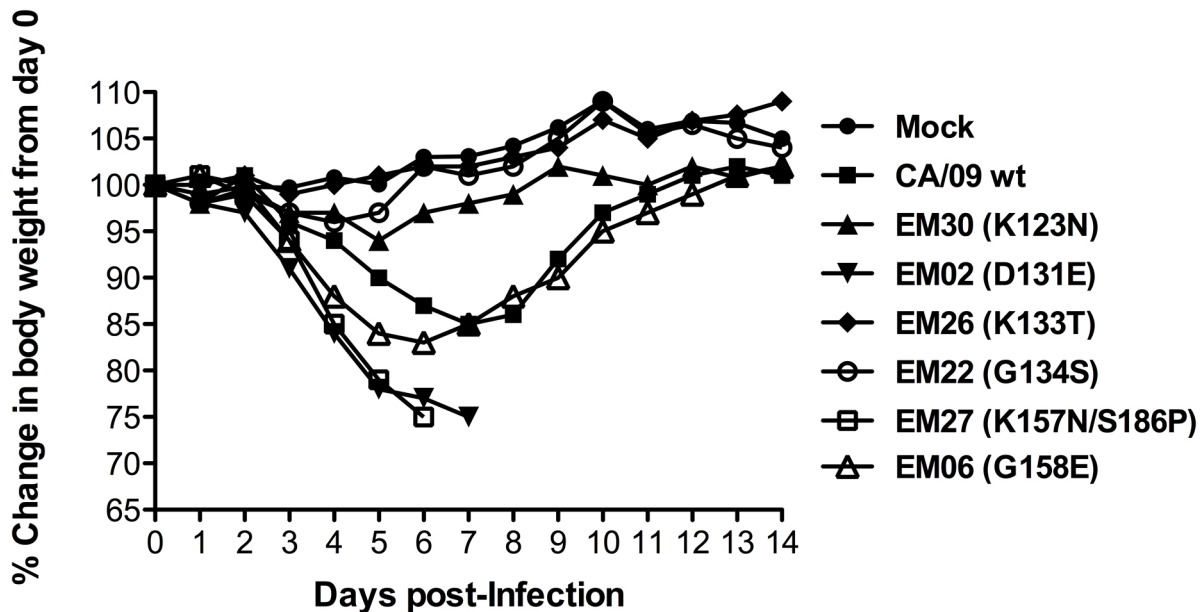**B**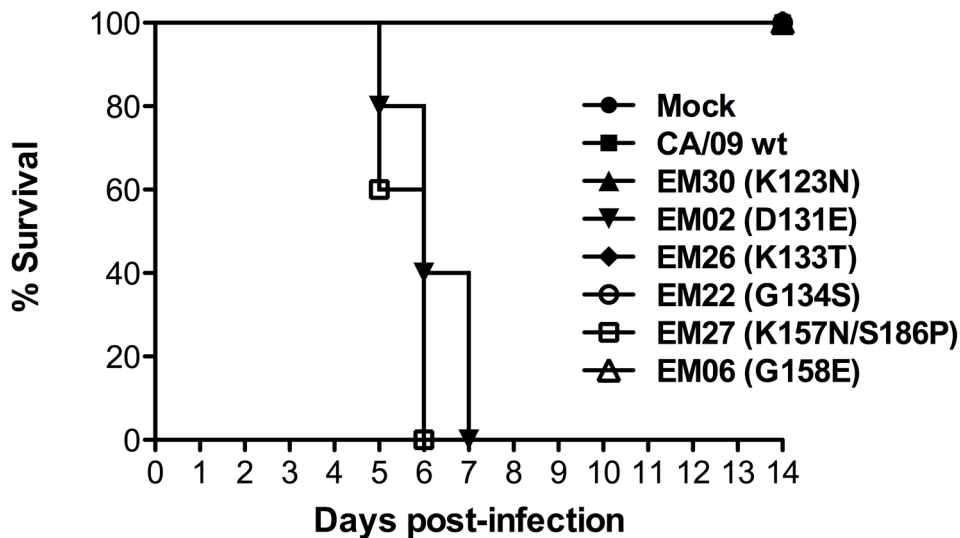

Supplement: mbo003121280sf03.pdf [file mbo003121280sf03.pdf]

**A**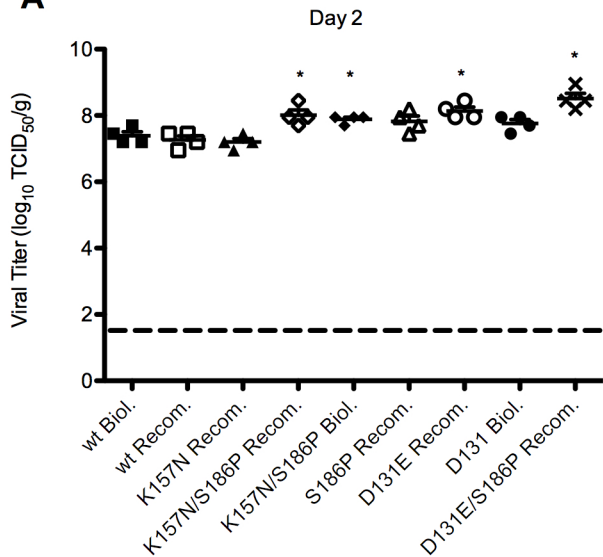**B**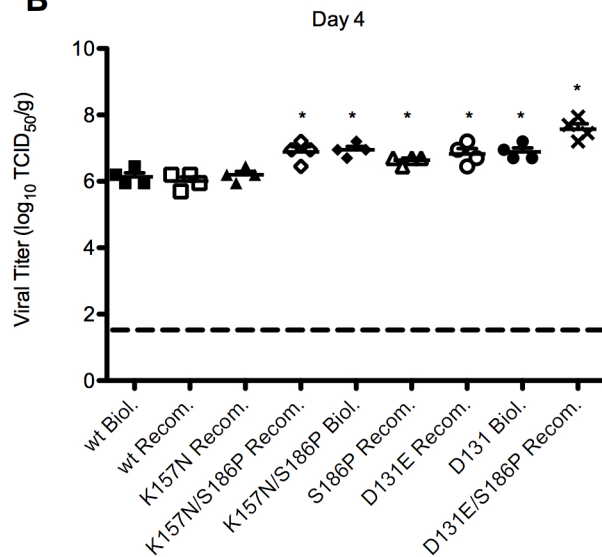**C**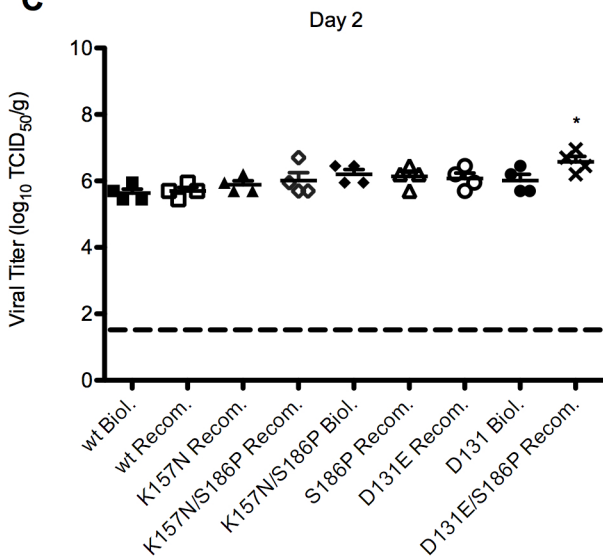**D**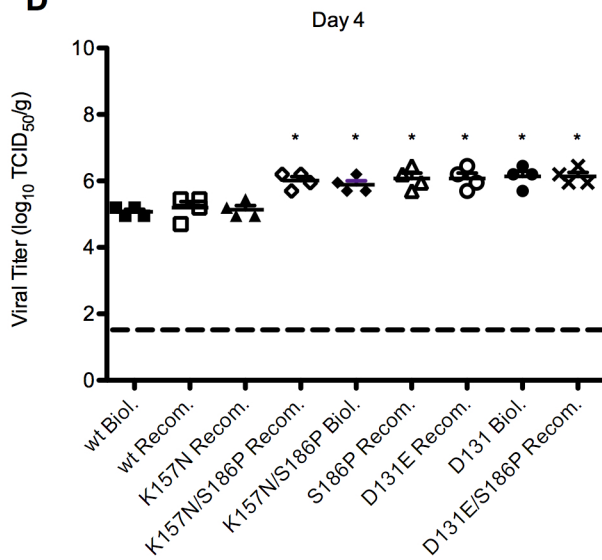

Supplement: mbo003121280sf04.pdf [file mbo003121280sf04.pdf]
